# Supplementary material for: Reaction pathways and energetics of the deconstruction of lignin carbohydrate complexes (LCCs) in lignocellulosic biomass
Source: Royal Society of Chemistry journal article supplement (doi:10.1039/d4se00193a), 2024-01-01
Supplement: d4se00193a1.pdf [file d4se00193a1.pdf]

Supporting Information for

*Reaction Pathways and Energetics of the Deconstruction of Lignin Carbohydrate Complexes (LCCs) in Lignocellulosic Biomass*

Seth Beck<sup>+</sup>, Samir H. Mushrif<sup>+\*</sup>

<sup>+</sup>Department of Chemical and Materials Engineering, University of Alberta, 116 St NW, Edmonton, AB, T6G 2E1, Canada

\*Corresponding Author Email: [mushrif@ualberta.ca](mailto:mushrif@ualberta.ca) (SHM)

Figure S.1, S.2 and S.3 show the molecular structures of the product compounds resulting from the C<sub>6</sub> – O<sub>1</sub>, C<sub>2</sub> – OH and C<sub>3</sub> – OH bond breaking pathways, respectively.

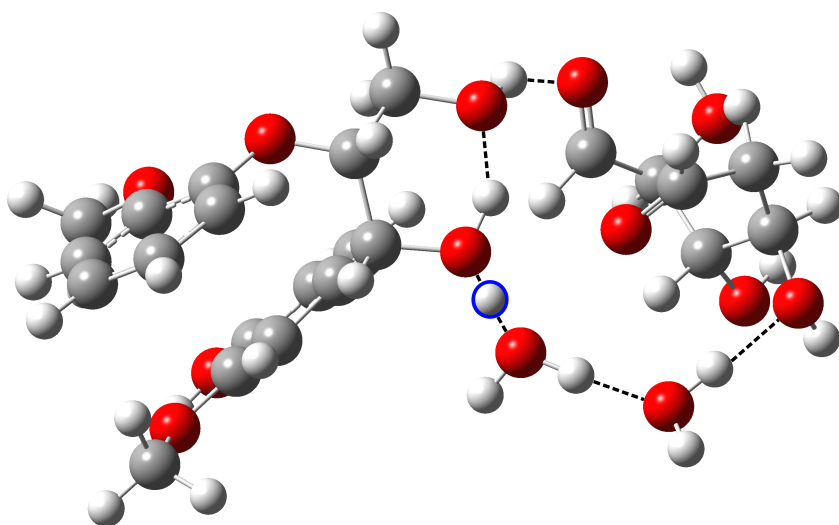

Figure S.1: The product structure resulting from the C<sub>6</sub> – O<sub>1</sub> bond breaking pathway. Carbon, oxygen and hydrogen are colored in gray, red and white, respectively. The approximate location of the positive charge is highlighted in a blue circle and the hydrogen bonds are depicted with black dashed lines.

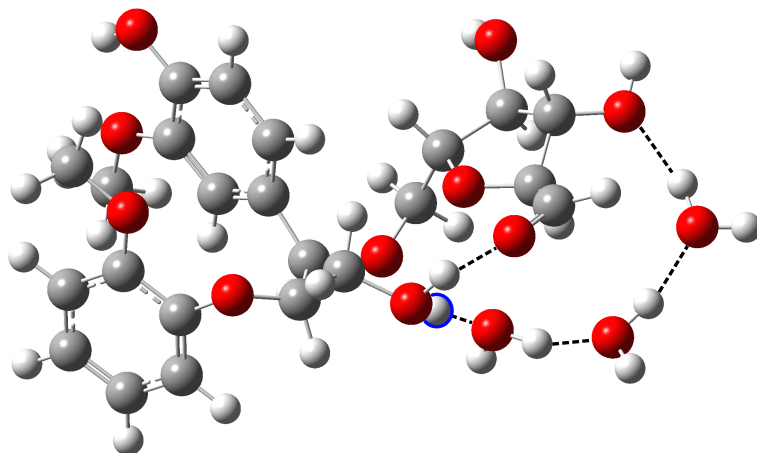

Figure S.2: The product structure resulting from the  $C_2 - OH$  bond breaking pathway. Carbon, oxygen and hydrogen are colored in gray, red and white, respectively. The approximate location of the positive charge is highlighted in a blue circle and the hydrogen bonds are depicted with black dashed lines.

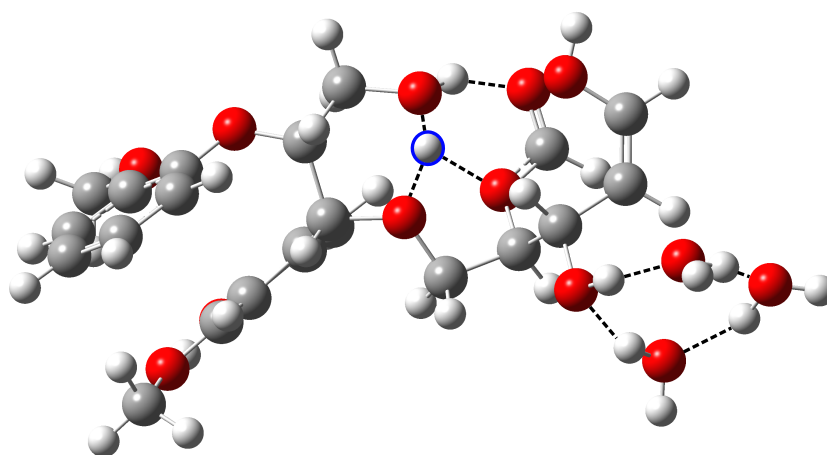

Figure S.3: The product structure resulting from the  $C_3 - OH$  bond breaking pathway. Carbon, oxygen and hydrogen are colored in gray, red and white, respectively. The approximate location of the positive charge is highlighted in a blue circle and the hydrogen bonds are depicted with black dashed lines.
